# Supplementary material for: Impedance measurement technique for high-sensitivity cell detection in microstructures with non-uniform conductivity distribution
Source: Royal Society of Chemistry journal article supplement (doi:10.1039/c2lc40158d), 2012-01-01
Supplement: c2lc40158d.pdf [file c2lc40158d.pdf]

# Impedance measurement technique for high-sensitivity cell detection in microstructures with non-uniform conductivity distribution

Andrea Faenza, Massimo Bocchi, Nicola Pecorari, Eleonora Franchi and Roberto Guerrieri

## ESI:

A. Differential based impedance measurement technique:

Resistance model:

$$\begin{cases} R_{bc} = R_0 + 3\Delta R \\ R_{ac} = kR_0 + 4\Delta R + \Delta R_C \end{cases}$$

Output signal:

$$V_{out} = V_{in} R_f \frac{(R_{ac} - R_{bc})}{R_{ac} R_{bc}}$$

Output signal when  $\Delta R = \Delta R_C = 0$ :

$$V_{out0} = V_{in} \frac{R_f k - 1}{R_0 k}$$

Output signal variation:

$$(S1) \quad \Delta V_{out} = V_{out} - V_{out0} = V_{in} R_f \left[ \frac{(k-1)R_0 + \Delta R + \Delta R_C}{(R_0 + 3\Delta R)(kR_0 + 4\Delta R + \Delta R_C)} - \frac{k-1}{kR_0} \right]$$

$$(S2) \quad |\Delta V_{out}|_{noise=0} = \left| V_{in} \frac{R_f}{R_0} \left[ \frac{(k-1)R_0 + \Delta R_C}{(kR_0 + \Delta R_C)} - \frac{k-1}{k} \right] \right| = \left| V_{in} \frac{R_f}{kR_0} \left[ \frac{-\Delta R_C}{(kR_0 + \Delta R_C)} \right] \right|$$

$$(S3) \quad |\Delta V_{out}|_{signal=0} = \left| V_{in} R_f \left[ \frac{(k-1)R_0 + \Delta R}{(R_0 + 3\Delta R)(kR_0 + 4\Delta R)} - \frac{k-1}{kR_0} \right] \right| \approx \left| V_{in} \frac{R_f}{kR_0} \left[ \frac{-R_0 \Delta R (3k^2 - 4)}{(R_0 + 3\Delta R)(kR_0 + 4\Delta R)} \right] \right|$$

$$(S4) \quad SNR_{diff,asym} = \frac{|\Delta V_{out}|_{noise=0}}{|\Delta V_{out}|_{signal=0}} \approx \left| \frac{\Delta R_C}{(kR_0 + \Delta R_C)} \frac{(R_0 + 3\Delta R)(kR_0 + 4\Delta R)}{R_0 \Delta R (3k^2 - 4)} \right|$$

Approximation of equation (S4) for  $R_0 \gg \Delta R, \Delta R_C$ :

$$(S5) \quad SNR_{diff,asym} \approx \left| \frac{\Delta R_C}{\Delta R (3k^2 - 4)} \right|$$

B. Division based impedance measurement technique:

Resistance model:

$$\begin{cases} R_{bc} = R_0 + 3\Delta R \\ R_{ac} = kR_0 + 4\Delta R + \Delta R_C \end{cases}$$

Output signal:

$$V_{out} = A_{div} \frac{R_{bc}}{R_{ac}}$$

Output signal when  $\Delta R = \Delta R_C = 0$ :

$$V_{out0} = \frac{A_{div}}{k}$$

Output signal variation:

$$(S6) \quad \Delta V_{out} = V_{out} - V_{out0} = A_{div} \frac{R_0 + 3\Delta R}{kR_0 + 4\Delta R + \Delta R_C} - \frac{A_{div}}{k} = A_{div} \frac{(3k-4)\Delta R - \Delta R_C}{k(kR_0 + 4\Delta R + \Delta R_C)}$$

$$(S7) \quad |\Delta V_{out}|_{noise=0} = \left| A_{div} \frac{-\Delta R_C}{k(kR_0 + \Delta R_C)} \right|$$

$$(S8) \quad |\Delta V_{out}|_{signal=0} = \left| A_{div} \frac{(3k-4)\Delta R}{k(kR_0 + 4\Delta R)} \right|$$

$$(S9) \quad SNR_{div,asym} = \frac{|\Delta V_{out}|_{noise=0}}{|\Delta V_{out}|_{signal=0}} = \left| \frac{\Delta R_C}{(kR_0 + \Delta R_C)} \frac{(kR_0 + 4\Delta R)}{(3k-4)\Delta R} \right|$$

Approximation for  $R_0 \gg \Delta R, \Delta R_C$ :

$$(S10) \quad SNR_{div,asym} \approx \left| \frac{\Delta R_C}{\Delta R(3k-4)} \right|$$

### C. $\Delta V_{out}$ comparison

Equation (S1) and (S6) varying  $\Delta R/R_0$  with:  $V_{in} = 1V$ ,  $R_f = 20k\Omega$ ,  $k=3$ ,  $R_0 = 16.2k\Omega$ ,  $A_{div} = 1$ ,  $\Delta R_C/R_0 = 0.01$ .

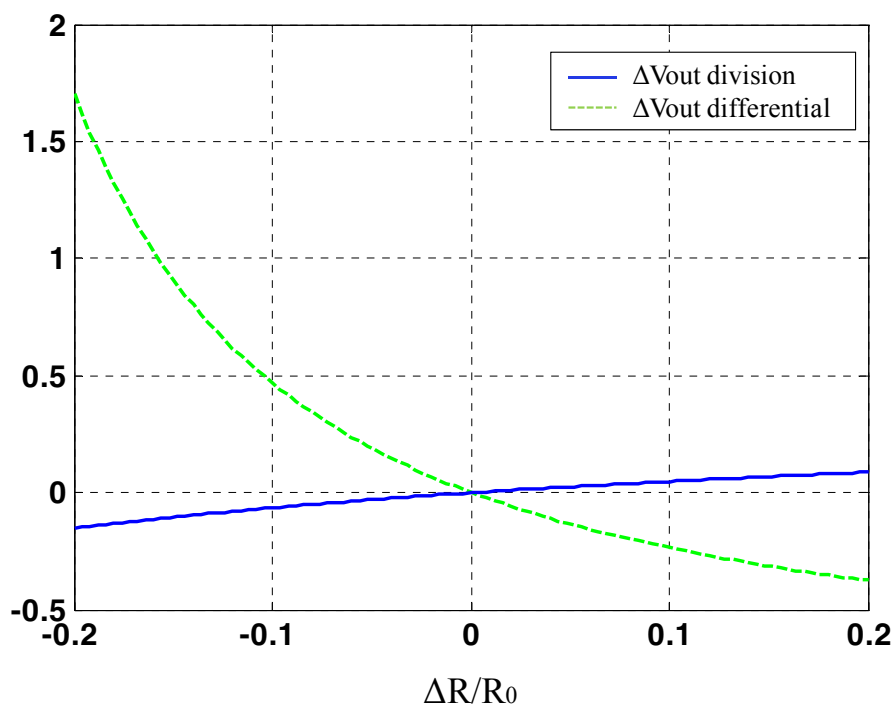

### D. SNR comparison

In the top figure, equation (S4) and (S9) are plotted against  $\Delta R/R_0$  with:  $V_{in} = 1V$ ,  $R_f = 20k\Omega$ ,  $k=3$ ,  $R_0 = 16.2k\Omega$ ,  $A_{div} = 1$ ,  $\Delta R_C/R_0 = 0.01$ .

In the bottom figure,  $SNRR = SNR_{division}/SNR_{differential}$ .

For  $\Delta R/R_0 = 0$  the two graphs are not defined because the two SNR are not defined.

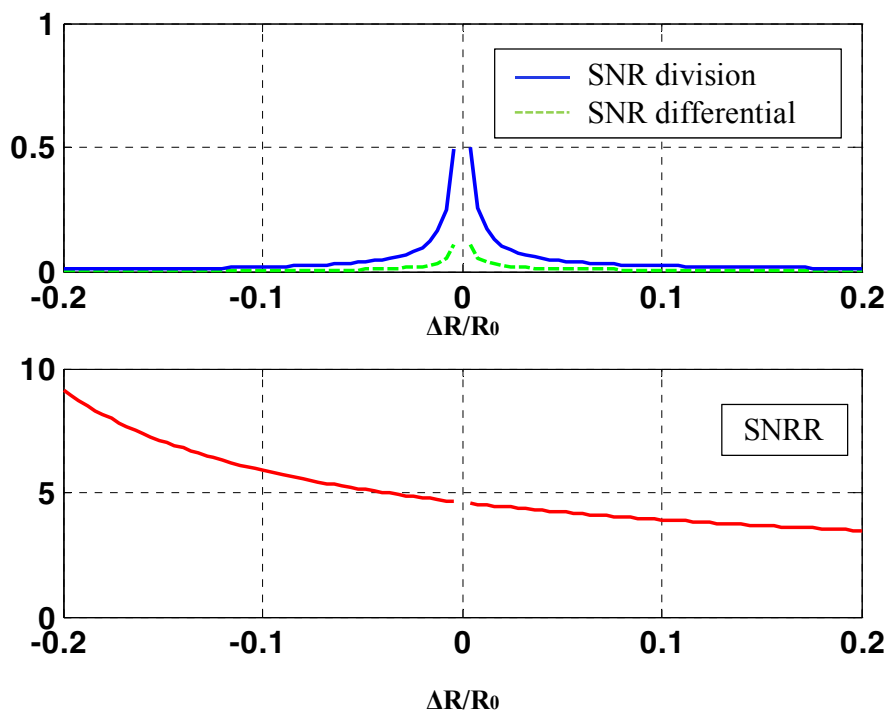

*E. Noise to noise comparison ( $\Delta RC/R_0=0$ )*

In the top figure, equation (S1) and (S6) are plotted against  $\Delta R/R_0$  with:  $V_{in} = 1V$ ,  $R_f = 20k\Omega$ ,  $k=3$ ,  $R_0=16.2k\Omega$ ,  $A_{div} = 1$ ,  $\Delta RC/R_0 = 0$ .

In the bottom figure, the ratio of the two curves shows that for  $\Delta RC/R_0$  in the range  $[-20\%; 20\%]$  with the division approach the noise-induced variation is attenuated of a factor which goes from 4.29 to 11.23.

For  $\Delta RC/R_0$  in the range  $[-10\%; 10\%]$ , the noise attenuation factor goes from 4.8 to 7.2.

For  $\Delta RC/R_0$  in the range  $[-5\%; 5\%]$ , the noise attenuation factor goes from 5.2 to 6.3.

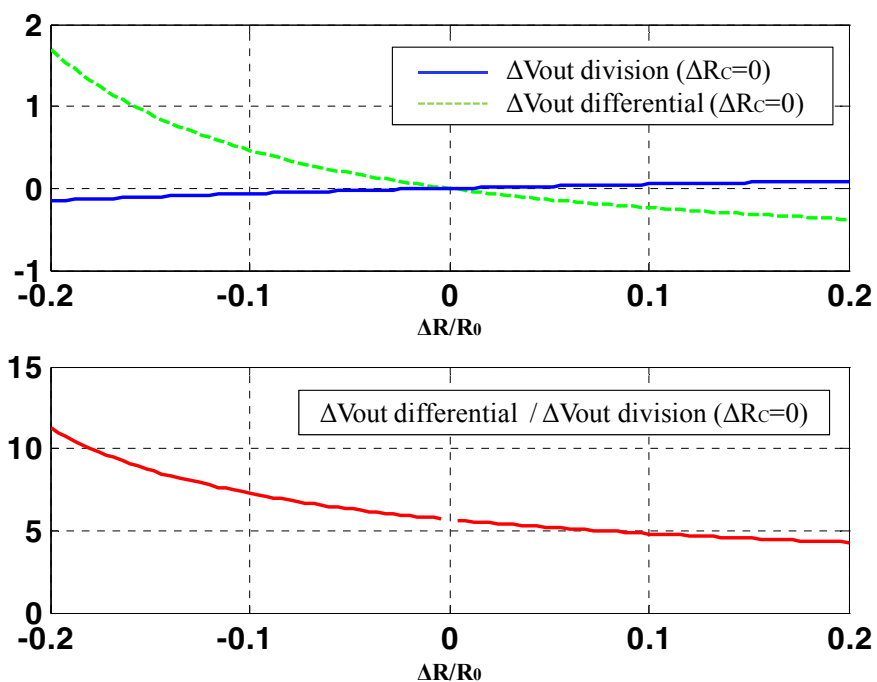

## SUPPLEMENTARY FIGURES:

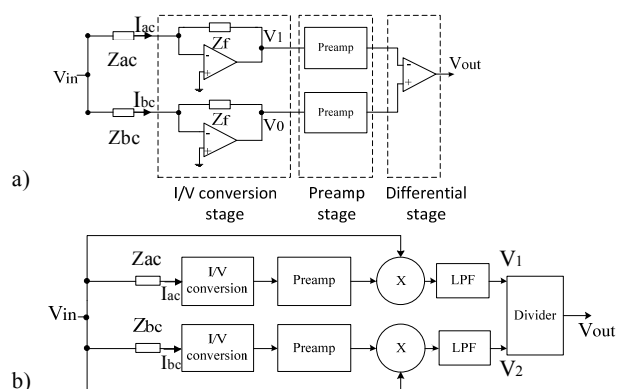

**Fig. S1** a) Diagram of the differential circuit used to compare the two impedances in the microchannel. b) Block diagram of the proposed custom circuit which includes an I/V conversion stage, a preamplifier, an analog multiplier, a low-pass-filter and an analog divider.

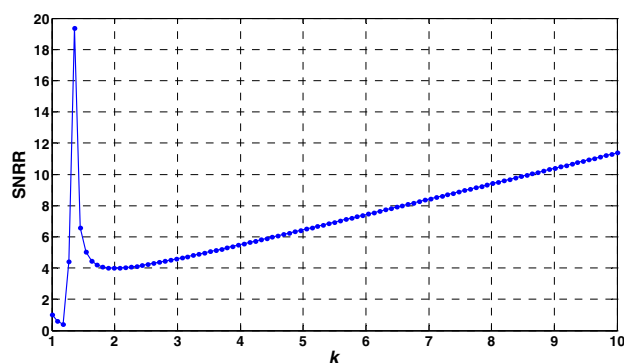

**Fig. S2** The SNRR ratio ( $SNR_{div}/SNR_{diff}$ ) as described by equation (ss) varying  $k$  in the range [1:10]. For  $k = 3$  the S/S ratio is 4.6 which means 4.6 times higher efficiency using the proposed approach.

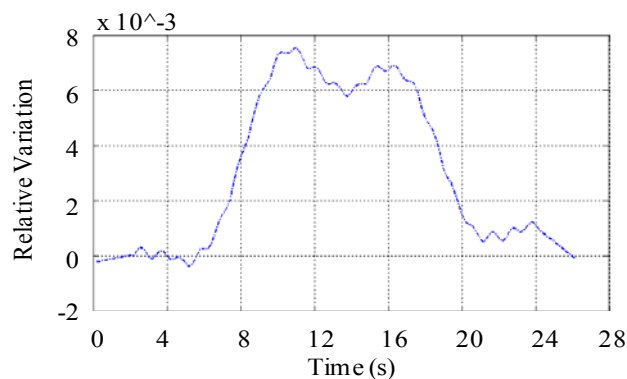

**Fig. S3** Relative output signal variation due to two consecutive cells being detected.
